# Supplementary material
Source: ML conference proceedings conference paper supplement (https://proceedings.mlr.press/v180/cheng22a.html)
Supplement: Supplementary file 1 [file cheng22a-supp.pdf]

---

# Greedy Modality Selection via Approximate Submodular Maximization (Supplementary material)

---

Runxiang Cheng<sup>\*1</sup>    Gargi Balasubramaniam<sup>\*1</sup>    Yifei He<sup>\*1</sup>    Yao-Hung Hubert Tsai<sup>2</sup>    Han Zhao<sup>1</sup>

<sup>1</sup>University of Illinois Urbana-Champaign, Illinois, USA

<sup>2</sup>Carnegie Mellon University, Pennsylvania, USA

## 1 PRELIMINARY FOR MISSING PROOFS

**Proposition 1.1.** *Let  $X, Y \in \{0, 1\}$  be random variables,  $\mathcal{H}$  be the class of functions of  $X$  such that  $\forall h \in \mathcal{H}, h(X) \in [0, 1]$ , and  $\ell(\cdot, \cdot)$  be the cross-entropy loss. We have:*

$$\inf_{h \in \mathcal{H}} \mathbb{E}[\ell(Y, h(X))] = H(Y | X) \quad (1)$$

*Proof.* Let  $x, \hat{y}$  be the instantiation of  $X, \hat{Y}$  respectively, where  $\hat{Y} := h(X)$ .  $\mathbb{1}(\cdot)$  denotes the indicator function, and  $D_{\text{KL}}(\cdot \| \cdot)$  denotes the Kullback–Leibler divergence.

$$\mathbb{E}_{\mathcal{D}}[\ell(Y, h(X))] = \mathbb{E}_{X,Y}[-\mathbb{1}(Y = 1) \log \hat{Y} - \mathbb{1}(Y = 0) \log(1 - \hat{Y})] \quad (2)$$

$$= -\mathbb{E}_X[\mathbb{E}_{Y|x}[\mathbb{1}(Y = 1) \log \hat{y} + \mathbb{1}(Y = 0) \log(1 - \hat{y})]] \quad (3)$$

$$= -\mathbb{E}_X[\Pr(Y = 1 | x) \log \hat{y} + \Pr(Y = 0 | x) \log(1 - \hat{y})] \quad (4)$$

$$= \mathbb{E}_X[\Pr(Y = 1 | x) \log \frac{1}{\hat{y}} + \Pr(Y = 0 | x) \log \frac{1}{1 - \hat{y}}] \quad (5)$$

$$= \mathbb{E}_X[\Pr(Y = 1 | x) \log \frac{\Pr(Y = 1 | x)}{\hat{y}} + \Pr(Y = 0 | x) \log \frac{\Pr(Y = 0 | x)}{1 - \hat{y}}] \quad (6)$$

$$+ \mathbb{E}_X[-\Pr(Y = 1 | x) \log \Pr(Y = 1 | x) - \Pr(Y = 0 | x) \log \Pr(Y = 0 | x)] \quad (7)$$

$$= \mathbb{E}_X[D_{\text{KL}}(\Pr(Y | x) \| h(x))] + \mathbb{E}_X[H(Y | x)] \quad (8)$$

$$= D_{\text{KL}}(\Pr(Y | X) \| h(X)) + H(Y | X) \quad (9)$$

Since  $H(Y | X) \geq 0$  and is unrelated to  $h(X)$ ,  $\mathbb{E}_{\mathcal{D}}[\ell(Y, h(X))]$  is minimum when  $h(X) = \Pr(Y | X)$ . ■

## 2 MISSING PROOFS

**Proposition 2.1.** *Given  $Y \in \{0, 1\}$  and  $\ell(Y, \hat{Y}) := \mathbb{1}(Y = 1) \log \hat{Y} + \mathbb{1}(Y = 0) \log(1 - \hat{Y})$ ,  $f_u(S) = I(S; Y)$ .*

*Proof.* By Definition 3.1 and Proposition 1.1, we have:

$$f_u(S) = \inf_{h \in \mathcal{H}} \mathbb{E}[\ell(Y, c)] - \inf_{h \in \mathcal{H}} \mathbb{E}[\ell(Y, h(S))] \quad (10)$$

$$= H(Y | c) - H(Y | S) \quad (11)$$

$$= H(Y) - H(Y | S) \quad (12)$$

$$= I(S; Y) \quad (13)$$

---

<sup>\*</sup>Equal contribution.

■

**Proposition 2.2.**  $\forall M \subseteq N \subseteq V, I(N; Y) - I(M; Y) = I(N \setminus M; Y | M) \geq 0.$

*Proof.* Let  $N := \{X_1, \dots, X_n\}, M := \{X_1, \dots, X_m\}, n \geq m.$

$$I(N; Y) - I(M; Y) = \sum_{i=1}^n I(X_i; Y | X_{i-1}, \dots, X_1) - \sum_{i=1}^m I(X_i; Y | X_{i-1}, \dots, X_1) \quad (14)$$

$$= \sum_{i=m+1}^n I(X_i; Y | X_{i-1}, \dots, X_1) \quad (15)$$

$$= I(N \setminus M; Y | M) \quad (16)$$

$$\geq 0 \quad (17)$$

■

**Proposition 2.3.** *Under Assumption 2.1,  $I(S; Y)$  is  $\epsilon$ -approximately submodular, i.e.,  $\forall A \subseteq B \subseteq V, e \in V \setminus B, I(A \cup \{e\}; Y) - I(A; Y) + \epsilon \geq I(B \cup \{e\}; Y) - I(B; Y).$*

*Proof.* For subset  $A$ , we have:

$$I(A \cup \{e\}; Y) - I(A; Y) = I(\{e\}; Y | A) \quad (18)$$

$$= I(\{e\}; Y, A) - I(\{e\}; A) \quad (19)$$

$$= I(\{e\}; Y) + I(\{e\}; A | Y) - I(\{e\}; A) \quad (20)$$

Similarly,  $I(B \cup \{e\}; Y) - I(B; Y) = I(\{e\}; Y) + I(\{e\}; B | Y) - I(\{e\}; B).$  Given Assumption 2.1 holds, we denote  $I(\{e\}; A | Y) = \epsilon_A$  and  $I(\{e\}; B | Y) = \epsilon_B$  where  $\epsilon_A, \epsilon_B \leq \epsilon.$  In the worst case where  $\epsilon_A = 0,$  absolute submodularity is still satisfied if  $\epsilon_B \leq I(\{e\}; B) - I(\{e\}; A),$  i.e.,

$$I(B \cup \{e\}; Y) - I(B; Y) = I(\{e\}; Y) + I(\{e\}; B | Y) - I(\{e\}; B) \quad (21)$$

$$= I(\{e\}; Y) - I(\{e\}; B) + \epsilon_B \quad (22)$$

$$\leq I(\{e\}; Y) - I(\{e\}; B) + I(\{e\}; B) - I(\{e\}; A) = I(A \cup \{e\}; Y) - I(A; Y) \quad (23)$$

But if  $\epsilon_B > I(\{e\}; B) - I(\{e\}; A),$  the submodularity above will not hold. However, because  $\epsilon_B \leq \epsilon,$  we can define approximate submodularity characterized by the constant  $\epsilon \geq 0.$  Specifically:

$$I(B \cup \{e\}; Y) - I(B; Y) = I(\{e\}; Y) + I(\{e\}; B | Y) - I(\{e\}; B) \quad (24)$$

$$= I(\{e\}; Y) - I(\{e\}; B) + \epsilon_B \quad (25)$$

$$\leq I(\{e\}; Y) - I(\{e\}; B) + \epsilon \quad (26)$$

$$\leq I(\{e\}; Y) - I(\{e\}; A) + \epsilon \quad (27)$$

$$\leq I(\{e\}; Y) - I(\{e\}; A) + \epsilon_A + \epsilon \quad (28)$$

$$\leq I(A \cup \{e\}; Y) - I(A; Y) + \epsilon \quad (29)$$

■

**Theorem 2.1.** *Under Assumption 2.1, let  $q \in \mathbb{Z}^+,$  and  $S_p$  be the solution from Algorithm 1 at iteration  $p,$  we have:*

$$I(S_p; Y) \geq (1 - e^{-\frac{p}{q}}) \max_{S: |S| \leq q} I(S; Y) - q\epsilon \quad (30)$$

*Proof.* Let  $S^* := \max_{S: |S| \leq q} I(S; Y)$  be the optimal subset with cardinality at most  $q$ . By Proposition 3.2,  $|S^*| = q$ . We order  $S^*$  as  $\{X_1^*, \dots, X_q^*\}$ . Then for all positive integer  $i \leq p$ ,

$$I(S^*; Y) \leq I(S^* \cup S_i; Y) \quad (31)$$

$$= I(S_i; Y) + \sum_{j=1}^q I(X_j^*; Y \mid S_i \cup \{X_{j-1}^*, \dots, X_1^*\}) \quad (32)$$

$$= I(S_i; Y) + \sum_{j=1}^q (I(\{X_j^*, \dots, X_1^*\} \cup S_i; Y) - I(\{X_{j-1}^*, \dots, X_1^*\} \cup S_i; Y)) \quad (33)$$

$$\leq I(S_i; Y) + \sum_{j=1}^q (I(\{X_j^*\} \cup S_i; Y) - I(S_i; Y) + \epsilon) \quad (34)$$

$$\leq I(S_i; Y) + \sum_{j=1}^q (I(S_{i+1}; Y) - I(S_i; Y) + \epsilon) \quad (35)$$

$$\leq I(S_i; Y) + q(I(S_{i+1}) - I(S_i; Y) + \epsilon) \quad (36)$$

Eq. (31) is from Proposition 3.2, Eq. (32) and Eq. (33) are by the chain rule of mutual information, Eq. (34) is from Proposition 3.3, Eq. (35) is by the definition of Algorithm 1 that  $I(S_{i+1}; Y) - I(S_i; Y)$  is maximized in each iteration  $i$ . Let  $\delta_i := I(S^*; Y) - I(S_i; Y)$ , we can rewrite Eq. (36) into  $\delta_i \leq q(\delta_i - \delta_{i+1} + \epsilon)$ , which can be rearranged into  $\delta_{i+1} \leq (1 - \frac{1}{q})\delta_i + \epsilon$ .

Let  $\delta_0 = I(S^*; Y) - I(S_0; Y)$ . Since  $S_0 = \emptyset$ , we have  $\delta_0 = I(S^*; Y)$ . By the previous results, we can upper bound the quantity  $\delta_p = I(S^*; Y) - I(S_p; Y)$  as follows:

$$\delta_p \leq (1 - \frac{1}{q})\delta_{p-1} + \epsilon \quad (37)$$

$$\leq (1 - \frac{1}{q})((1 - \frac{1}{q})\delta_{p-2} + \epsilon) + \epsilon \quad (38)$$

$$\leq (1 - \frac{1}{q})^p \delta_0 + (1 + (1 - \frac{1}{q}) + \dots + (1 - \frac{1}{q})^{p-1})\epsilon \quad (39)$$

$$= (1 - \frac{1}{q})^p \delta_0 + (\frac{1 - (1 - \frac{1}{q})^{p-1+1}}{1 - (1 - \frac{1}{q})})\epsilon \quad (40)$$

$$= (1 - \frac{1}{q})^p \delta_0 + (q - q(1 - \frac{1}{q})^p)\epsilon \quad (41)$$

$$\leq (1 - \frac{1}{q})^p \delta_0 + q\epsilon \quad (42)$$

$$\leq e^{-\frac{p}{q}} \delta_0 + q\epsilon \quad (43)$$

Eq. (39) to Eq. (41) is through the summation of the geometric series  $1 + (1 - \frac{1}{q}) + \dots + (1 - \frac{1}{q})^{p-1}$ . Eq. (43) is by the inequality  $1 - x \leq e^{-x}$  for all  $x \in \mathbb{R}$ . Substitute the definitions of  $\delta_p$  and  $\delta_0$  into Eq. (43) completes the proof.  $\blacksquare$

**Corollary 2.1.** *Assume conditions in Theorem 3.1 hold, there exists optimal predictor  $h^*(S_p) = \Pr(Y \mid S_p)$  such that*

$$\begin{aligned} \mathbb{E}[\ell_{01}(Y, h^*(S_p))] &\leq \mathbb{E}[\ell_{ce}(Y, h^*(S_p))] \\ &\leq H(Y) - (1 - e^{-\frac{p}{q}})I(S^*; Y) + q\epsilon \end{aligned} \quad (44)$$

*Proof.* Denote the quantity  $(1 - e^{-\frac{p}{q}}) \max_{S: |S| \leq q} I(S; Y) - q\epsilon$  from Theorem 3.1 as letter  $b$ . By the definition of mutual information, we have  $H(Y \mid S_p) \leq H(Y) - b$ . Following Proposition 1.1,  $\inf_{h: S_p \rightarrow [0,1]} \mathbb{E}[\ell_{ce}(Y, h(S_p))] \leq H(Y) - b$ . In other words,  $\exists h^* = \Pr(Y \mid S_p)$  s.t.  $\mathbb{E}[\ell_{ce}(Y, h^*(S_p))] \leq H(Y) - b$ .

When the predictor is probabilistic (i.e.,  $h(X) = 0$  if and only if  $h(X) \leq 0.5$ ),  $\ell_{01}(Y, \hat{Y}) = \mathbb{1}(Y \neq \hat{Y})$  naturally extends to  $Y \mathbb{1}(\hat{Y} \leq 0.5) + (1 - Y) \mathbb{1}(\hat{Y} > 0.5)$ , which is upper bounded by  $\ell_{ce}(Y, \hat{Y})$  for all  $(Y, \hat{Y})$ . Therefore, for the same  $h^*$  as

above, we have:

$$\mathbb{E}[\ell_{01}(Y, h^*(S_p))] \leq \mathbb{E}[\ell_{ce}(Y, h^*(S_p))] \leq H(Y) - b \quad (45)$$

■

**Corollary 2.2.** *Assume conditions in Theorem 3.1 hold. There exists optimal predictors  $h_1^* = \Pr(Y | S_p)$ ,  $h_2^* = \Pr(Y | S^*)$  such that*

$$\begin{aligned} \mathbb{E}[\ell_{ce}(Y, h_1^*(S_p))] - \mathbb{E}[\ell_{ce}(Y, h_2^*(S^*))] \\ \leq e^{-\frac{b}{q}} I(S^*; Y) + q\epsilon \end{aligned} \quad (46)$$

*Proof.* Following Theorem 3.1, and denote  $\arg \max_{S: |S| \leq q} I(S; Y)$  as  $S^*$ , we have:

$$I(S_p; Y) \geq (1 - e^{-\frac{b}{q}}) \max_{S: |S| \leq q} I(S; Y) - q\epsilon \quad (47)$$

$$\implies H(Y) - H(Y | S_p) \geq (1 - e^{-\frac{b}{q}})(H(Y) - H(Y | S^*)) - q\epsilon \quad (48)$$

$$\implies H(Y | S_p) - H(Y | S^*) \leq e^{-\frac{b}{q}}(H(Y) - H(Y | S^*)) + q\epsilon \quad (49)$$

$$\implies H(Y | S_p) - H(Y | S^*) \leq e^{-\frac{b}{q}}(I(S^*; Y)) + q\epsilon \quad (50)$$

Using Proposition 1.1 completes the proof. ■

**Proposition 2.4.** *Under Assumption 2.1,  $I(S; Y)$  is  $\epsilon$ -approximately sub-additive for any  $S \subseteq V$ , i.e.,  $I(S \cup S'; Y) \leq I(S; Y) + I(S'; Y) + \epsilon$ .*

*Proof.*

$$I(S \cup S'; Y) = I(S; Y) + I(S'; Y | S) \quad (51)$$

$$= I(S; Y) + I(S \cup Y; S') - I(S; S') \quad (52)$$

$$= I(S; Y) + I(S'; Y) + I(S; S' | Y) - I(S; S') \quad (53)$$

$$\leq I(S; Y) + I(S'; Y) + \epsilon \quad (54)$$

Eq. (53) to Eq. (54) because  $I(S; S' | Y) \leq \epsilon$  by Assumption 2.1, and  $I(S; S')$  is always non-negative. ■

**Proposition 2.5.** *Under Assumption 3.1,  $I(S; Y)$  is  $\epsilon$ -approximately super-additive for any  $S \subseteq V$ , i.e.,  $I(S \cup S'; Y) \geq I(S; Y) + I(S'; Y) - \epsilon$ .*

*Proof.* Similarly to the proof of Proposition 3.4, we have:

$$I(S \cup S'; Y) = I(S; Y) + I(S'; Y) + I(S; S' | Y) - I(S; S') \quad (55)$$

$$\geq I(S; Y) + I(S'; Y) - \epsilon \quad (56)$$

Eq. (55) to Eq. (56) because  $I(S; S') \leq \epsilon$  by Assumption 3.1, and  $I(S; S' | Y)$  is non-negative. ■

**Proposition 2.6.** *If conditions in Proposition 3.4 and Proposition 3.5 hold, we have  $I(X_i; Y) - \epsilon \leq \phi_{I, X_i} \leq I(X_i; Y) + \epsilon$  for any  $X_i \in V$ .*

*Proof.* By Proposition 3.4 and Proposition 3.5, for any  $X_i \in V$  and  $S \subseteq V$ , we have:

$$I(X_i; Y) - \epsilon \leq I(S \cup \{X_i\}; Y) - I(S; Y) \leq I(X_i; Y) + \epsilon \quad (57)$$

Let's first apply the right inequality in Eq. (57) to Definition 2.2. Because  $I(X_i; Y) + \epsilon$  is independent of  $S$ , we can simplify the calculation of the upper bound of  $\phi_{I, X_i}$  as follows.

$$\phi_{I, X_i} = \sum_{S \subseteq V \setminus \{X_i\}} \frac{|S|!(|V| - |S| - 1)!}{|V|!} (I(S \cup \{i\}; Y) - I(S; Y)) \quad (58)$$

$$\leq \sum_{S \subseteq V \setminus \{i\}} \frac{|S|!(|V| - |S| - 1)!}{|V|!} (I(X_i; Y) + \epsilon) \quad (59)$$

$$= \sum_{|S|=0}^{|V|-1} \binom{|V|-1}{|S|} \frac{|S|!(|V| - |S| - 1)!}{|V|!} (I(X_i; Y) + \epsilon) \quad (60)$$

$$= \sum_{|S|=0}^{|V|-1} \frac{(|V|-1)!}{|S|!(|V|-1-|S|)!} \frac{|S|!(|V| - |S| - 1)!}{|V|!} (I(X_i; Y) + \epsilon) \quad (61)$$

$$= \sum_{|S|=0}^{|V|-1} \frac{1}{|V|} (I(X_i; Y) + \epsilon) \quad (62)$$

$$= I(X_i; Y) + \epsilon \quad (63)$$

Applying the same procedure to the left inequality in Eq. (57) to Definition 2.2, we have  $\phi_{I, X_i} \geq I(X_i; Y) - \epsilon$ . Combining both results completes the proof. ■

**Proposition 2.7.** *Under Assumption 2.1,  $\forall X_i \in V$ , we have  $I(X_i; Y) \leq \phi_{I, X_i}^{mci} \leq I(X_i; Y) + \epsilon$ .*

*Proof.* By Proposition 3.3,  $I(\cdot; Y)$  would be approximately submodular under Assumption 2.1, thus:

$$I(X_i; Y) + \epsilon = I(\emptyset \cup X_i; Y) - I(\emptyset; Y) + \epsilon \quad (64)$$

$$\geq \max_{S \subseteq V} I(S \cup X_i; Y) - I(S; Y) = \phi_{I, X_i}^{mci} \quad (65)$$

On the other hand, if  $\arg \max_{S \subseteq V} I(S \cup X_i; Y) - I(S; Y) = \emptyset$ , we have  $\phi_{I, X_i}^{mci} = I(\emptyset \cup X_i; Y) - I(\emptyset; Y) = I(X_i; Y)$ . If  $\arg \max_{S \subseteq V} I(S \cup X_i; Y) - I(S; Y)$  is some non-empty subset  $A$ , we have  $\phi_{I, X_i}^{mci} = I(A \cup X_i; Y) - I(A; Y) \geq I(\emptyset \cup X_i; Y) - I(\emptyset; Y)$ . In this case,  $\phi_{I, X_i}^{mci} \geq I(X_i; Y)$ . Combining both inequalities completes the proof. ■
